# Supplementary material for: The tRNA-Cys-GCA Derived tsRNAs Suppress Tumor Progression of Gliomas via Regulating VAV2
Source: Hindawi journal article supplement (doi:10.1155/2022/8708312), 2022-11-15
Supplement: f1 [file 8708312.f1.zip]

**Table S3. A summary of the identified tsRNAs with available expression abundance in glioma datasets.**

| tsRNA               | types   | median | mean   | min    | max    |
|---------------------|---------|--------|--------|--------|--------|
| tRFdb-3003a         | 3'-tRF  | 14.289 | 13.877 | 7.7285 | 18.602 |
| tRFdb-3003b         | 3'-tRF  | 13.917 | 13.506 | 7.3585 | 18.23  |
| tRFdb-3020a         | 3'-tRF  | 14.574 | 14.707 | 9.9196 | 18.193 |
| tRFdb-3012a         | 3'-tRF  | 15.872 | 15.318 | 7.8317 | 17.984 |
| tRFdb-3012b         | 3'-tRF  | 15.632 | 15.134 | 8.2924 | 17.694 |
| tRFdb-3029a         | 3'-tRF  | 13.76  | 13.731 | 8.207  | 17.833 |
| tRFdb-3029b         | 3'-tRF  | 12.435 | 12.383 | 7.2217 | 17.34  |
| tRFdb-5005b         | 5'-tRF  | 12.039 | 11.909 | 7.0386 | 17.829 |
| tRFdb-5005c         | 5'-tRF  | 11.729 | 11.598 | 6.7309 | 17.519 |
| tRFdb-5026a         | 5'-tRF  | 12.039 | 11.976 | 7.2074 | 18.27  |
| 5P_tRNA-Lys-TTT-3-1 | 5'U-tRF | 12.157 | 12.06  | 7.3584 | 18.142 |
| tRFdb-3030a         | 3'-tRF  | 17.162 | 17.173 | 9.1163 | 18.878 |
| tRFdb-3030b         | 3'-tRF  | 16.872 | 16.884 | 8.8274 | 18.589 |
| tRFdb-3033a         | 3'-tRF  | 12.217 | 12.074 | 7.5631 | 18.41  |
| tRFdb-3006a         | 3'-tRF  | 12.478 | 12.355 | 7.0734 | 17.775 |
| tRFdb-3006b         | 3'-tRF  | 12.106 | 11.983 | 6.7046 | 17.403 |
| tRFdb-3016a         | 3'-tRF  | 11.708 | 11.654 | 6.8395 | 16.209 |
| tRFdb-3016b         | 3'-tRF  | 11.497 | 11.442 | 6.63   | 15.997 |
| ts-96               | tRF-1   | 13.33  | 13.175 | 5.5544 | 17.608 |
| tRFdb-5002a         | 5'-tRF  | 15.189 | 15.176 | 8.5685 | 18.608 |
| tRFdb-5002b         | 5'-tRF  | 14.749 | 14.735 | 8.1293 | 18.167 |
| tRFdb-5002c         | 5'-tRF  | 14.043 | 14.029 | 7.4263 | 17.461 |
| tRFdb-3001a         | 3'-tRF  | 11.955 | 11.89  | 7.2823 | 18.193 |
| tRFdb-3013a         | 3'-tRF  | 11.417 | 11.343 | 6.662  | 16.41  |
| tRFdb-3013b         | 3'-tRF  | 11.045 | 10.971 | 6.2942 | 16.039 |
| tRFdb-3021a         | 3'-tRF  | 11.84  | 11.739 | 6.1712 | 15.3   |
| ts-26               | tRF-1   | 15.246 | 14.389 | 5.3882 | 17.346 |
| tRFdb-3015a         | 3'-tRF  | 13.386 | 13.202 | 6.7256 | 16.171 |
| tRFdb-3015b         | 3'-tRF  | 13.174 | 12.99  | 6.5163 | 15.959 |
| tRFdb-5027b         | 5'-tRF  | 10.364 | 10.27  | 6.2337 | 15.968 |
| tRFdb-5027c         | 5'-tRF  | 9.9282 | 9.8448 | 5.8097 | 15.537 |
| tRFdb-5017a         | 5'-tRF  | 12.049 | 11.929 | 6.8707 | 17.183 |
| tRFdb-5017b         | 5'-tRF  | 11.165 | 11.048 | 5.9966 | 16.298 |
| tRFdb-3024a         | 3'-tRF  | 11.316 | 11.384 | 6.5174 | 15.44  |
| tRFdb-3025a         | 3'-tRF  | 11.316 | 11.384 | 6.5174 | 15.44  |
| ts-58               | tRF-1   | 10.5   | 10.427 | 4.4122 | 14.612 |
| tRFdb-3024b         | 3'-tRF  | 10.812 | 10.846 | 6.2314 | 15.119 |
| tRFdb-3025b         | 3'-tRF  | 10.812 | 10.846 | 6.2314 | 15.119 |
| tRFdb-3002b         | 3'-tRF  | 10.222 | 10.192 | 4.7455 | 14.543 |
| tRFdb-3002a         | 3'-tRF  | 10.513 | 10.485 | 5.0252 | 14.833 |
| ts-42               | tRF-1   | 10.812 | 10.789 | 6.5465 | 14.817 |
| tRFdb-5026b         | 5'-tRF  | 10.96  | 10.945 | 4.6838 | 17.915 |
| tRFdb-5026c         | 5'-tRF  | 10.529 | 10.514 | 4.2726 | 17.485 |
| tRFdb-1024          | tRF-1   | 11.178 | 11.204 | 6.3523 | 14.775 |
| tRFdb-1036          | tRF-1   | 11.343 | 11.253 | 6.3523 | 14.715 |
| ts-50               | tRF-1   | 10.349 | 10.323 | 5.4953 | 17.505 |
| tRFdb-5024a         | 5'-tRF  | 11.846 | 11.784 | 6.5754 | 17.398 |
| 5P_tRNA-Val-CAC-1-1 | 5'U-tRF | 10.167 | 10.017 | 5.4457 | 14.999 |
| tRFdb-3008a         | 3'-tRF  | 10.939 | 10.983 | 6.6031 | 17.1   |
| tRFdb-3008b         | 3'-tRF  | 10.567 | 10.611 | 6.2355 | 16.729 |
| tRFdb-5024b         | 5'-tRF  | 11.287 | 11.3   | 5.1605 | 16.928 |

|                     |         |        |        |        |        |
|---------------------|---------|--------|--------|--------|--------|
| tRFdb-5009a         | 5'-tRF  | 10.985 | 11.213 | 6.6766 | 17.637 |
| tRFdb-5009b         | 5'-tRF  | 10.369 | 10.597 | 6.0674 | 17.02  |
| tRFdb-5009c         | 5'-tRF  | 9.9389 | 10.167 | 5.6443 | 16.589 |
| ts-110              | tRF-1   | 10.403 | 10.383 | 4.8341 | 14.93  |
| tRFdb-5012b         | 5'-tRF  | 9.7315 | 9.7027 | 6.0164 | 13.164 |
| tRFdb-5013b         | 5'-tRF  | 9.8459 | 9.8271 | 6.1457 | 13.238 |
| tRFdb-5012a         | 5'-tRF  | 10.04  | 10.075 | 6.4467 | 13.286 |
| tRFdb-3004a         | 3'-tRF  | 10.712 | 10.714 | 6.0841 | 13.863 |
| ts-1                | tRF-1   | 9.567  | 9.5756 | 4.4045 | 14.824 |
| tRFdb-5001a         | 5'-tRF  | 10.258 | 10.216 | 6.2622 | 14.599 |
| tRFdb-5011a         | 5'-tRF  | 10.182 | 10.179 | 6.2674 | 13.557 |
| ts-6                | tRF-1   | 9.69   | 9.6345 | 5.6743 | 12.731 |
| 5P_tRNA-Tyr-GTA-2-1 | 5'U-tRF | 9.7797 | 9.7497 | 5.8534 | 14.184 |
| tRFdb-3011a         | 3'-tRF  | 10.034 | 9.9601 | 5.0252 | 14.102 |
| tRFdb-3011b         | 3'-tRF  | 9.745  | 9.6711 | 4.7455 | 13.813 |
| tRFdb-3026a         | 3'-tRF  | 10.086 | 10.013 | 5.5944 | 15.847 |
| tRFdb-3026b         | 3'-tRF  | 9.7964 | 9.7243 | 5.3115 | 15.557 |
| tRFdb-3007a         | 3'-tRF  | 11.286 | 11.264 | 6.7325 | 16.689 |
| ts-30               | tRF-1   | 9.9619 | 9.9113 | 5.6371 | 13.627 |
| 5P_tRNA-Arg-ACG-2-1 | 5'U-tRF | 10.009 | 9.998  | 5.8038 | 14.576 |
| tRFdb-5013c         | 5'-tRF  | 9.1837 | 9.1507 | 5.6803 | 12.318 |
| tRFdb-5014a         | 5'-tRF  | 10.171 | 10.162 | 5.9532 | 14.728 |
| ts-75               | tRF-1   | 10.737 | 10.684 | 4.9681 | 16.07  |
| 5P_tRNA-Gly-CCC-2-1 | 5'U-tRF | 9.4499 | 9.3518 | 4.8167 | 12.029 |
| tRFdb-5007a         | 5'-tRF  | 9.8585 | 9.7597 | 5.2189 | 12.444 |
| tRFdb-5007c         | 5'-tRF  | 8.8601 | 8.7618 | 4.2571 | 11.444 |
| tRFdb-3027a         | 3'-tRF  | 9.5616 | 9.5401 | 5.1052 | 14.248 |
| tRFdb-5004b         | 5'-tRF  | 9.6525 | 9.4623 | 4.6843 | 13.421 |
| tRFdb-5004c         | 5'-tRF  | 9.1584 | 8.9688 | 4.2123 | 12.927 |
| ts-88               | tRF-1   | 8.8334 | 8.7758 | 4.3935 | 15.217 |
| tRFdb-3027b         | 3'-tRF  | 9.0684 | 9.0274 | 4.7455 | 12.236 |
| 5P_tRNA-Pro-AGG-2-1 | 5'U-tRF | 9.3642 | 9.3303 | 5.336  | 12.826 |
| tRFdb-3014a         | 3'-tRF  | 10.099 | 10.101 | 6.1712 | 14.058 |
| tRFdb-3014b         | 3'-tRF  | 9.8102 | 9.8121 | 5.8861 | 13.769 |
| tRFdb-5016a         | 5'-tRF  | 9.9352 | 9.9739 | 4.7688 | 14.769 |
| tRFdb-1030          | tRF-1   | 10.386 | 10.343 | 6.4309 | 14.299 |
| ts-81               | tRF-1   | 9.234  | 9.2251 | 4.5075 | 14.269 |
| 5P_tRNA-Leu-CAA-4-1 | 5'U-tRF | 9.2282 | 9.1928 | 4.3712 | 12.446 |
| ts-38               | tRF-1   | 9.0999 | 9.0145 | 4.0666 | 12.801 |
| tRFdb-3009a         | 3'-tRF  | 10.577 | 10.52  | 7.0142 | 13.459 |
| tRFdb-3009b         | 3'-tRF  | 10.298 | 10.254 | 6.7272 | 13.17  |
| tRFdb-5015a         | 5'-tRF  | 10.102 | 10.126 | 4.9681 | 14.976 |
| tRFdb-5005a         | 5'-tRF  | 9.6388 | 9.6158 | 5.5495 | 14.643 |
| ts-55               | tRF-1   | 9.2521 | 9.2813 | 4.6092 | 13.253 |
| 5P_tRNA-Lys-CTT-2-1 | 5'U-tRF | 9.3013 | 9.2306 | 4.9561 | 14.228 |
| 5P_tRNA-Val-AAC-1-1 | 5'U-tRF | 9.1167 | 9.0206 | 4.3712 | 11.897 |
| tRFdb-3017a         | 3'-tRF  | 10.784 | 10.85  | 6.4444 | 14.008 |
| tRFdb-5008b         | 5'-tRF  | 8.907  | 8.9358 | 4.6838 | 13.165 |
| tRFdb-5003b         | 5'-tRF  | 9.6314 | 9.7253 | 4.6843 | 14.447 |
| tRFdb-5003c         | 5'-tRF  | 9.1374 | 9.2316 | 4.2123 | 13.952 |
| tRFdb-3017b         | 3'-tRF  | 10.635 | 10.658 | 6.2355 | 13.78  |
| ts-105              | tRF-1   | 10.355 | 10.357 | 5.9444 | 13.484 |
| tRFdb-3005a         | 3'-tRF  | 10.175 | 10.391 | 6.0841 | 13.456 |
| tRFdb-5008c         | 5'-tRF  | 8.4198 | 8.4984 | 5.2912 | 12.782 |
| ts-7                | tRF-1   | 8.6798 | 8.7005 | 4.6092 | 11.497 |

|                     |        |        |        |        |        |
|---------------------|--------|--------|--------|--------|--------|
| tRFdb-3004b         | 3'-tRF | 9.8097 | 10.027 | 5.7184 | 13.084 |
| tRFdb-3005b         | 3'-tRF | 9.8097 | 10.027 | 5.7184 | 13.084 |
| ts-9                | tRF-1  | 8.9967 | 9.1093 | 5.2613 | 15.541 |
| tRFdb-3022a         | 3'-tRF | 9.4654 | 9.6361 | 5.7246 | 16.015 |
| tRFdb-3022b         | 3'-tRF | 9.1764 | 9.3472 | 5.4412 | 15.725 |
| 5P_tRNA-Gly-GCC-2-1 | 5'-tRF | 9.4724 | 9.3014 | 4.3712 | 12.608 |
| 5P_tRNA-Pro-CGG-1-1 | 5'-tRF | 8.8465 | 8.9272 | 5.0434 | 12.352 |
| 5P_tRNA-Gly-GCC-2-2 | 5'-tRF | 9.3159 | 9.1779 | 4.3712 | 12.781 |
| tRFdb-3023a         | 3'-tRF | 9.223  | 9.1239 | 6.6404 | 13.343 |
| ts-36               | tRF-1  | 8.6915 | 8.6762 | 5.6192 | 13.689 |
| ts-48               | tRF-1  | 8.9926 | 9.0153 | 5.6057 | 13.744 |
| tRFdb-3023b         | 3'-tRF | 8.8522 | 8.7474 | 6.2726 | 12.971 |
| 5P_tRNA-Ala-AGC-8-1 | 5'-tRF | 9.2922 | 9.2335 | 5.9201 | 12.286 |
| tRFdb-5023a         | 5'-tRF | 9.2351 | 9.083  | 4.6792 | 13.462 |
| ts-60               | tRF-1  | 8.8628 | 8.7587 | 5.3064 | 12.098 |
| 5P_tRNA-Gly-TCC-2-1 | 5'-tRF | 8.853  | 8.8991 | 4.3712 | 13.038 |
| tRFdb-5020a         | 5'-tRF | 9.5852 | 9.5467 | 4.8648 | 13.623 |
| 5P_tRNA-Lys-TTT-3-2 | 5'-tRF | 9.1669 | 9.0843 | 6.0445 | 12.21  |
| 5P_tRNA-Val-CAC-4-1 | 5'-tRF | 9.2205 | 9.1197 | 5.0434 | 15.321 |
| 5P_tRNA-His-GTG-1-1 | 5'-tRF | 8.9397 | 8.8139 | 4.3712 | 13.89  |
| ts-74               | tRF-1  | 8.3921 | 8.2928 | 5.4844 | 12.033 |
| 5P_tRNA-Gly-TCC-2-6 | 5'-tRF | 8.7462 | 8.677  | 4.9193 | 12.852 |
| tRFdb-3031a         | 3'-tRF | 9.2626 | 9.7787 | 5.1052 | 16.055 |
| tRFdb-3031b         | 3'-tRF | 8.445  | 8.9629 | 4.3175 | 15.236 |
| tRFdb-1032          | tRF-1  | 9.0899 | 8.889  | 5.3595 | 13.079 |
| tRFdb-5023b         | 5'-tRF | 8.453  | 8.3676 | 4.18   | 12.939 |
| 5P_tRNA-Arg-TCT-1-1 | 5'-tRF | 8.8883 | 8.7658 | 4.3712 | 13.55  |
| ts-65               | tRF-1  | 8.5976 | 8.5792 | 5.2062 | 11.564 |
| ts-68               | tRF-1  | 8.3901 | 8.3875 | 5.6743 | 11.063 |
| tRFdb-5010a         | 5'-tRF | 10.242 | 10.308 | 5.9831 | 15.283 |
| ts-89               | tRF-1  | 8.3331 | 8.3557 | 4.8329 | 11.366 |
| tRFdb-1040          | tRF-1  | 8.8222 | 8.7908 | 5.3224 | 11.044 |
| ts-12               | tRF-1  | 8.6215 | 8.5103 | 4.555  | 13.501 |
| 5P_tRNA-His-GTG-1-9 | 5'-tRF | 8.3617 | 8.383  | 4.9193 | 11.855 |
| ts-67               | tRF-1  | 8.046  | 7.9664 | 5.4875 | 10.433 |
| ts-47               | tRF-1  | 7.6406 | 7.6289 | 3.8207 | 11.629 |
| tRFdb-3021b         | 3'-tRF | 8.5908 | 8.6888 | 4.9103 | 12.738 |
| ts-43               | tRF-1  | 7.654  | 7.6284 | 3.578  | 11.015 |
| ts-80               | tRF-1  | 7.1167 | 6.9856 | 3.4393 | 9.3207 |
| 5P_tRNA-His-GTG-1-7 | 5'-tRF | 8.4476 | 8.3936 | 4.3712 | 12.775 |
| ts-109              | tRF-1  | 8.1126 | 7.9469 | 4.0666 | 10.517 |
| ts-53               | tRF-1  | 7.8624 | 7.85   | 4.4891 | 10.262 |
| ts-108              | tRF-1  | 6.9849 | 6.8941 | 3.8339 | 12.514 |
| 5P_tRNA-Leu-CAA-1-1 | 5'-tRF | 8.6533 | 8.5797 | 4.3712 | 11.943 |
| tRFdb-1031          | tRF-1  | 8.5129 | 8.4614 | 4.6792 | 11.257 |
| 5P_tRNA-Asn-GTT-1-1 | 5'-tRF | 8.619  | 8.5367 | 5.0434 | 12.999 |
| tRFdb-3019a         | 3'-tRF | 8.277  | 8.2112 | 5.9532 | 10.432 |
| tRFdb-3019b         | 3'-tRF | 7.9885 | 7.9229 | 5.6689 | 10.143 |
| tRFdb-5021b         | 5'-tRF | 8.7084 | 8.6404 | 5.7089 | 13.151 |
| ts-104              | tRF-1  | 7.8698 | 7.8629 | 4.8898 | 11.425 |
| 5P_tRNA-Glu-TTC-1-1 | 5'-tRF | 8.8479 | 8.8233 | 4.9561 | 11.688 |
| ts-63               | tRF-1  | 7.9866 | 7.9879 | 5.249  | 11.8   |
| tRFdb-5021a         | 5'-tRF | 9.1148 | 9.0064 | 6.0653 | 11.655 |
| ts-51               | tRF-1  | 7.8389 | 7.8288 | 4.9902 | 11.444 |
| tRFdb-5029a         | 5'-tRF | 8.9211 | 8.9891 | 5.1034 | 11.84  |

|             |        |        |        |        |        |
|-------------|--------|--------|--------|--------|--------|
| tRFdb-5029b | 5'-tRF | 8.5683 | 8.6365 | 4.7614 | 11.486 |
| ts-23       | tRF-1  | 9.1616 | 9.065  | 4.5639 | 12.39  |
