# Supplementary material for: The tRNA-Cys-GCA Derived tsRNAs Suppress Tumor Progression of Gliomas via Regulating VAV2
Source: Hindawi journal article supplement (doi:10.1155/2022/8708312), 2022-11-15
Supplement: f1 [file 8708312.f1.zip]

**Table S4. The expression profiles of tRNA-Cys-GCA derived tsRNAs with in glioma samples.**

| barcode          | tRFdb-3003a | tRFdb-3003b | tRFdb-5015a | tRFdb-5016a | tRFdb-5017a | tRFdb-5017b | ts-55 | ts-56 | ts-60 |
|------------------|-------------|-------------|-------------|-------------|-------------|-------------|-------|-------|-------|
| TCGA-CS-4938-01B | 15.879      | 15.507      | NA          | NA          | NA          | NA          | NA    | NA    | 7.848 |
| TCGA-CS-4941-01A | 12.342      | 11.971      | 10.923      | 10.716      | 13.381      | 12.497      | 10.98 | 9.101 | NA    |
| TCGA-CS-4942-01A | 10.402      | 10.031      | NA          | NA          | 12.111      | 11.226      | 8.848 | NA    | NA    |
| TCGA-CS-4943-01A | 10.384      | 10.012      | 12.092      | 11.886      | 15.294      | 14.409      | 9.828 | NA    | NA    |
| TCGA-CS-4944-01A | 12.561      | 12.189      | 11.507      | 11.301      | 13.607      | 12.722      | 7.763 | NA    | NA    |
| TCGA-CS-5390-01A | 11.29       | 10.918      | 11.677      | 11.47       | 13.551      | 12.666      | 9.15  | NA    | 9.209 |
| TCGA-CS-5393-01A | 11.497      | 11.125      | 11.562      | 11.355      | 14.021      | 13.136      | 10.62 | NA    | NA    |
| TCGA-CS-5394-01A | 11.752      | 11.38       | 9.5556      | 9.3495      | 9.5556      | 8.6727      | NA    | NA    | 10.99 |
| TCGA-CS-5395-01A | 13.698      | 13.326      | NA          | NA          | NA          | NA          | 9.821 | NA    | 8.882 |
| TCGA-CS-5396-01A | 10.428      | 10.056      | 11.814      | 11.93       | 12.622      | 11.737      | 9.872 | NA    | NA    |
| TCGA-CS-5397-01A | 8.5781      | 8.2073      | 7.1641      | 6.9592      | 8.48        | 7.5989      | NA    | NA    | 5.306 |
| TCGA-CS-6186-01A | 11.594      | 11.222      | NA          | NA          | 8.9835      | 8.1014      | 9.04  | NA    | NA    |
| TCGA-CS-6188-01A | 14.196      | 13.824      | 8.4784      | 8.2726      | 9.0621      | 8.5936      | NA    | NA    | NA    |
| TCGA-CS-6290-01A | 11.336      | 10.964      | NA          | NA          | 10.986      | 10.102      | 6.884 | 7.998 | NA    |
| TCGA-CS-6666-01A | 14.426      | 14.054      | NA          | NA          | 12.533      | 11.649      | NA    | NA    | NA    |
| TCGA-CS-6667-01A | 14.992      | 14.62       | NA          | NA          | 12.54       | 11.656      | 9.898 | NA    | 8.958 |
| TCGA-CS-6668-01A | 15.593      | 15.221      | 11.2        | 10.993      | NA          | NA          | NA    | NA    | NA    |
| TCGA-CS-6669-01A | 9.9454      | 9.5738      | NA          | NA          | 11.069      | 10.185      | 7.809 | NA    | 8.865 |
| TCGA-CS-6670-01A | 13.114      | 12.742      | NA          | NA          | 12.049      | 11.165      | NA    | NA    | NA    |
| TCGA-DB-5270-01A | 11.714      | 11.342      | 10.102      | 9.8955      | 14.27       | 13.386      | 10.16 | NA    | NA    |
| TCGA-DB-5273-01A | 9.8428      | 9.4713      | NA          | NA          | 14.688      | 13.803      | NA    | NA    | NA    |
| TCGA-DB-5274-01A | 15.865      | 15.493      | 10.166      | 9.96        | 14.413      | 13.528      | 10.81 | NA    | 9.283 |
| TCGA-DB-5275-01A | 15.266      | 14.894      | NA          | NA          | 11.953      | 11.069      | 12.01 | NA    | NA    |
| TCGA-DB-5277-01A | 11.209      | 10.837      | 10.596      | 10.39       | 12.596      | 11.711      | NA    | NA    | NA    |
| TCGA-DB-5278-01A | 16.296      | 15.924      | NA          | NA          | 11.246      | 10.362      | 10.3  | NA    | NA    |
| TCGA-DB-5279-01A | 15.647      | 15.275      | NA          | NA          | 9.7872      | 8.9041      | 8.845 | NA    | NA    |
| TCGA-DB-5280-01A | NA          | NA          | 10.68       | 10.474      | 13.68       | 12.795      | NA    | NA    | NA    |
| TCGA-DB-5281-01A | 16.355      | 15.983      | NA          | NA          | 12.835      | 11.951      | 10.31 | NA    | 10.37 |
| TCGA-DB-A4X9-01A | 13.595      | 13.223      | 9.983       | 9.7768      | 13.069      | 12.185      | NA    | NA    | NA    |
| TCGA-DB-A4XA-01A | 13.769      | 13.397      | 11.069      | 10.863      | 12.876      | 11.992      | 9.128 | NA    | NA    |
| TCGA-DB-A4XB-01A | 15.38       | 15.008      | NA          | 10.861      | NA          | NA          | NA    | NA    | NA    |
| TCGA-DB-A4XC-01A | 12.8        | 12.429      | NA          | NA          | 12.772      | 11.888      | NA    | NA    | NA    |
| TCGA-DB-A4XD-01A | 14.965      | 14.593      | 10.652      | 10.446      | 11.652      | 10.768      | 9.71  | NA    | NA    |
| TCGA-DB-A4XE-01A | 15.31       | 14.938      | 11.79       | 11.584      | 15.249      | 14.365      | 9.848 | NA    | NA    |
| TCGA-DB-A4XF-01A | 15.072      | 14.7        | 12.186      | 11.98       | 15.06       | 14.176      | NA    | NA    | NA    |
| TCGA-DB-A4XG-01A | 15.042      | 14.67       | 10.845      | 10.638      | 15.429      | 14.544      | NA    | NA    | NA    |
| TCGA-DB-A4XH-01A | 12.583      | 12.212      | 13.633      | 13.427      | 16.385      | 15.501      | NA    | NA    | NA    |
| TCGA-DB-A64L-01A | 13.485      | 13.114      | NA          | NA          | 13.065      | 12.181      | NA    | NA    | NA    |
| TCGA-DB-A64O-01A | 12.246      | 11.875      | NA          | NA          | 10.634      | 9.7503      | NA    | NA    | NA    |
| TCGA-DB-A64P-01A | 13.424      | 13.052      | NA          | NA          | 12.489      | 11.605      | NA    | NA    | NA    |
| TCGA-DB-A64Q-01A | 13.735      | 13.363      | NA          | NA          | 11.315      | 10.431      | 10.37 | NA    | NA    |
| TCGA-DB-A64R-01A | 12.96       | 12.588      | NA          | NA          | NA          | NA          | NA    | NA    | NA    |
| TCGA-DB-A64S-01A | 18.055      | 17.683      | NA          | NA          | NA          | NA          | NA    | NA    | NA    |
| TCGA-DB-A64U-01A | 13.808      | 13.436      | NA          | NA          | 14.78       | 13.895      | 9.446 | NA    | NA    |
| TCGA-DB-A64V-01A | 16.626      | 16.254      | 12.621      | 12.415      | NA          | NA          | NA    | NA    | NA    |
| TCGA-DB-A64W-01A | 14.257      | 13.886      | 11.323      | 11.117      | 12.908      | 12.023      | 10.38 | NA    | NA    |
| TCGA-DB-A64X-01A | 13.491      | 13.119      | 11.071      | 10.865      | 12.071      | 11.187      | 10.13 | NA    | NA    |
| TCGA-DB-A75K-01A | 14.851      | 14.479      | NA          | NA          | 12.473      | 11.589      | NA    | NA    | 8.271 |
| TCGA-DB-A75L-01A | 17.068      | 16.696      | NA          | NA          | NA          | NA          | NA    | NA    | NA    |

|                  |        |        |        |        |        |        |       |       |       |
|------------------|--------|--------|--------|--------|--------|--------|-------|-------|-------|
| TCGA-DB-A75O-01A | 15.135 | 14.763 | 8.7312 | 8.5253 | 12.188 | 11.303 | NA    | NA    | NA    |
| TCGA-DB-A75P-01A | 13.752 | 13.38  | NA     | NA     | 12.955 | 12.07  | NA    | NA    | NA    |
| TCGA-DH-5140-01A | 15.109 | 14.737 | 12.497 | 12.29  | 12.497 | 11.612 | 12.67 | NA    | NA    |
| TCGA-DH-5141-01A | 16.002 | 15.63  | NA     | NA     | 14.296 | 13.411 | 13.25 | NA    | NA    |
| TCGA-DH-5142-01A | 10.881 | 10.509 | 11.683 | 11.477 | 14.683 | 13.798 | 8.742 | NA    | NA    |
| TCGA-DH-5143-01A | 11.754 | 11.382 | 12.141 | 11.935 | 12.878 | 11.994 | NA    | 9.734 | NA    |
| TCGA-DH-5144-01A | 11.92  | 11.548 | NA     | NA     | 10.401 | 9.5174 | 10.63 | 8.581 | 8.519 |
| TCGA-DH-A669-01A | 15.097 | 14.725 | 8.746  | 8.5401 | 13.471 | 12.586 | 8.389 | NA    | NA    |
| TCGA-DH-A66B-01A | 14.835 | 14.463 | 11.316 | 11.109 | 14.315 | 13.431 | NA    | NA    | NA    |
| TCGA-DH-A66D-01A | 14.026 | 13.654 | NA     | NA     | 15.041 | 14.156 | 10.01 | NA    | NA    |
| TCGA-DH-A66F-01A | 12.758 | 12.386 | 10.824 | 10.617 | 13.145 | 12.261 | NA    | NA    | NA    |
| TCGA-DH-A66G-01A | 14.875 | 14.503 | NA     | NA     | 12.94  | 12.056 | 12    | NA    | NA    |
| TCGA-DH-A7UR-01A | 14.031 | 13.659 | 10.718 | 10.512 | 13.525 | 12.641 | 9.776 | NA    | 9.835 |
| TCGA-DH-A7US-01A | 13.536 | 13.164 | 10.465 | 10.258 | 12.049 | 11.165 | NA    | NA    | NA    |
| TCGA-DH-A7UT-01A | 14.416 | 14.044 | 10.281 | 10.075 | 14.28  | 13.395 | 10.34 | NA    | 9.397 |
| TCGA-DH-A7UU-01A | 14.444 | 14.072 | NA     | NA     | 15.831 | 14.946 | NA    | NA    | NA    |
| TCGA-DH-A7UV-01A | 13.026 | 12.654 | NA     | NA     | 13.501 | 12.616 | 10.06 | NA    | NA    |
| TCGA-DU-5847-01A | 14.72  | 14.348 | 9.2764 | 9.3917 | 9.2764 | 8.3938 | NA    | NA    | NA    |
| TCGA-DU-5849-01A | 9.5972 | 9.2258 | NA     | NA     | 8.9853 | 8.1031 | NA    | 7.169 | 7.108 |
| TCGA-DU-5852-01A | 12.941 | 12.569 | 5.6495 | 5.4475 | 7.2152 | 6.3389 | NA    | 4.848 | NA    |
| TCGA-DU-5853-01A | 15.533 | 15.161 | 9.655  | 9.4489 | NA     | NA     | 7.717 | NA    | 7.775 |
| TCGA-DU-5854-01A | 11.66  | 11.288 | 6.5082 | 6.3042 | 8.9546 | 8.0726 | 4.609 | NA    | NA    |
| TCGA-DU-5855-01A | 11.495 | 11.124 | NA     | NA     | 12.158 | 11.274 | NA    | 7.817 | 7.756 |
| TCGA-DU-5870-01A | 18.199 | 17.827 | NA     | NA     | NA     | NA     | NA    | NA    | NA    |
| TCGA-DU-5871-01A | 11.595 | 11.223 | NA     | NA     | 8.9846 | 8.1025 | 8.044 | NA    | 7.108 |
| TCGA-DU-5872-01A | 11.338 | 10.967 | NA     | NA     | 9.5891 | 8.7062 | 8.647 | 7.45  | 8.706 |
| TCGA-DU-5874-01A | 9.8686 | 9.4971 | 7.7582 | 7.5528 | 8.7549 | 7.8732 | 6.242 | 6.94  | 5.319 |
| TCGA-DU-6392-01A | 9.4274 | 9.056  | 5.7518 | 5.5495 | 7.7316 | 6.8528 | 5.807 | 4.949 | 7.172 |
| TCGA-DU-6393-01A | 15.858 | 15.486 | 8.4937 | 8.2879 | 8.4937 | 7.6126 | 11.01 | NA    | 11.69 |
| TCGA-DU-6394-01A | 8.7429 | 8.3719 | 7.9947 | 7.7891 | 7.2615 | 6.3849 | 4.777 | 4.893 | 7.115 |
| TCGA-DU-6395-01A | 11.677 | 11.305 | NA     | NA     | 9.329  | 8.4464 | 6.811 | NA    | 6.87  |
| TCGA-DU-6396-01A | 11.473 | 11.102 | NA     | NA     | 11.745 | 10.861 | NA    | 8.341 | NA    |
| TCGA-DU-6397-01A | 9.9206 | 9.5491 | 7.4078 | 7.2026 | 7.4078 | 6.5304 | NA    | 7.584 | 6.53  |
| TCGA-DU-6399-01A | 10.931 | 10.56  | NA     | NA     | 6.8707 | 5.9966 | 6.927 | 7.627 | NA    |
| TCGA-DU-6400-01A | 11.502 | 11.13  | NA     | NA     | 9.0167 | 8.1345 | 9.488 | 6.621 | 9.132 |
| TCGA-DU-6401-01A | 11.841 | 11.469 | NA     | NA     | NA     | NA     | NA    | NA    | NA    |
| TCGA-DU-6402-01A | 9.7537 | 9.3822 | 10.988 | 10.781 | 10.403 | 9.6348 | NA    | 7.005 | 5.956 |
| TCGA-DU-6403-01A | 9.6152 | 9.2438 | 8.1311 | 7.9254 | 9.8645 | 8.9812 | NA    | 5.745 | 6.671 |
| TCGA-DU-6404-01A | 10.899 | 10.527 | 7.0484 | 6.8437 | NA     | NA     | 7.686 | 7.806 | 7.163 |
| TCGA-DU-6405-01A | 10.157 | 9.7851 | NA     | NA     | 8.4591 | 7.8985 | 5.543 | 7.227 | 5.601 |
| TCGA-DU-6406-01A | 9.8586 | 9.4871 | 7.7149 | 7.7712 | 9.4756 | 8.8267 | 7.771 | 7.379 | NA    |
| TCGA-DU-6407-01A | 16.421 | 16.049 | 9.0292 | 8.8232 | 9.6133 | 8.7303 | NA    | 7.213 | NA    |
| TCGA-DU-6408-01A | 10.607 | 10.236 | 8.6752 | 8.4692 | NA     | NA     | NA    | NA    | NA    |
| TCGA-DU-6410-01A | 15.693 | 15.321 | 8.1078 | 8.6367 | 9.1052 | 8.2229 | 7.582 | 5.722 | 7.64  |
| TCGA-DU-6542-01A | 10.041 | 9.6693 | NA     | NA     | 9.4286 | 8.5459 | 8.487 | 8.607 | NA    |
| TCGA-DU-7006-01A | 13.792 | 13.42  | 8.0453 | 8.8365 | 10.211 | 9.3274 | 7.688 | NA    | 6.175 |
| TCGA-DU-7007-01A | 14.57  | 14.198 | 7.8444 | 8.6353 | 10.646 | 9.7626 | NA    | 7.026 | NA    |
| TCGA-DU-7008-01A | 10.575 | 10.204 | NA     | NA     | NA     | NA     | 8.437 | NA    | NA    |
| TCGA-DU-7009-01A | 11.248 | 10.876 | NA     | NA     | 13.094 | 12.209 | NA    | NA    | NA    |
| TCGA-DU-7010-01A | 11.425 | 11.053 | 12.549 | 12.343 | 14.436 | 13.552 | 10.28 | NA    | NA    |
| TCGA-DU-7012-01A | 15.356 | 14.984 | 8.5371 | 8.3313 | 11.341 | 10.457 | 8.594 | 7.717 | NA    |
| TCGA-DU-7013-01A | 15.917 | 15.546 | NA     | NA     | 9.2844 | 8.4019 | NA    | 8.463 | NA    |
| TCGA-DU-7014-01A | 11.59  | 11.218 | NA     | NA     | 12.562 | 11.678 | 8.231 | 7.355 | 7.294 |

|                  |        |        |        |        |        |        |       |       |       |
|------------------|--------|--------|--------|--------|--------|--------|-------|-------|-------|
| TCGA-DU-7015-01A | 13.963 | 13.591 | NA     | NA     | NA     | NA     | NA    | NA    | NA    |
| TCGA-DU-7018-01A | 8.8238 | 8.4528 | 11.208 | 11.324 | 12.667 | 11.783 | NA    | NA    | NA    |
| TCGA-DU-7019-01A | 12.202 | 11.83  | NA     | NA     | 13.266 | 12.382 | 10.91 | NA    | NA    |
| TCGA-DU-7290-01A | 10.947 | 10.575 | 10.334 | 10.128 | 10.334 | 9.4507 | 8.808 | NA    | 7.87  |
| TCGA-DU-7292-01A | 15.523 | 15.151 | NA     | NA     | 9.3578 | 8.4752 | NA    | NA    | 8.475 |
| TCGA-DU-7294-01A | 15.509 | 15.137 | 10.027 | 9.8212 | 11.834 | 10.95  | 9.085 | NA    | NA    |
| TCGA-DU-7298-01A | 15.137 | 14.765 | NA     | NA     | 12.592 | 11.707 | 9.775 | 8.313 | NA    |
| TCGA-DU-7299-01A | 10.573 | 10.201 | 7.9644 | 8.7555 | 9.5455 | 8.6626 | NA    | 8.141 | NA    |
| TCGA-DU-7300-01A | 10.859 | 10.487 | 9.925  | 9.7187 | 12.094 | 11.209 | 9.567 | NA    | NA    |
| TCGA-DU-7301-01A | 9.9544 | 9.5829 | NA     | 8.1387 | 10.341 | 9.4575 | 8.401 | NA    | NA    |
| TCGA-DU-7302-01A | 14.805 | 14.433 | 9.6089 | 9.4028 | 14.308 | 13.423 | NA    | NA    | NA    |
| TCGA-DU-7304-01A | 10.36  | 9.9882 | 9.426  | 9.2198 | 11.232 | 10.348 | 7.488 | 7.608 | NA    |
| TCGA-DU-7306-01A | 13.707 | 13.335 | NA     | NA     | 9.7842 | 8.901  | NA    | NA    | NA    |
| TCGA-DU-7309-01A | 15.72  | 15.348 | NA     | NA     | 12.522 | 11.638 | NA    | NA    | NA    |
| TCGA-DU-8158-01A | 9.1398 | 8.7686 | NA     | 7.3268 | 11.11  | 10.226 | 7.588 | NA    | NA    |
| TCGA-DU-8161-01A | 9.9295 | 9.558  | 8.3196 | 8.1138 | 11.316 | 10.432 | NA    | NA    | NA    |
| TCGA-DU-8162-01A | 15.664 | 15.292 | 9.2209 | 10.013 | 13.026 | 12.142 | NA    | NA    | 8.338 |
| TCGA-DU-8163-01A | 15.051 | 14.679 | NA     | NA     | 12.718 | 11.834 | 7.694 | NA    | NA    |
| TCGA-DU-8164-01A | 16.394 | 16.022 | 8.9443 | 8.7383 | 10.527 | 9.6436 | 8.004 | 8.123 | NA    |
| TCGA-DU-8165-01A | 14.779 | 14.407 | 8.5554 | 8.3495 | 11.289 | 10.542 | NA    | NA    | 6.103 |
| TCGA-DU-8166-01A | 10.666 | 10.294 | NA     | NA     | 9.7321 | 8.849  | 8.376 | 7.913 | NA    |
| TCGA-DU-8167-01A | 15.031 | 14.659 | 6.9828 | 6.7781 | 12.181 | 11.297 | 7.039 | NA    | NA    |
| TCGA-DU-8168-01A | 15.479 | 15.107 | 10.167 | 10.545 | 11.751 | 10.867 | 9.809 | NA    | 9.284 |
| TCGA-DU-A5TP-01A | 13.362 | 12.99  | 10.106 | 9.9002 | 12.629 | 11.745 | NA    | NA    | NA    |
| TCGA-DU-A5TR-01A | 11.349 | 10.978 | NA     | NA     | 13.151 | 12.267 | NA    | NA    | NA    |
| TCGA-DU-A5TS-01A | 16.911 | 16.539 | 14.976 | 14.769 | NA     | NA     | NA    | NA    | NA    |
| TCGA-DU-A5TT-01A | 12.848 | 12.476 | 10.651 | 10.444 | 14.82  | 13.935 | NA    | NA    | NA    |
| TCGA-DU-A5TU-01A | 12.782 | 12.41  | 12.17  | 11.963 | 12.17  | 11.285 | NA    | NA    | NA    |
| TCGA-DU-A5TW-01A | 12.782 | 12.41  | NA     | NA     | 15.24  | 14.355 | NA    | NA    | NA    |
| TCGA-DU-A5TY-01A | 12.711 | 12.339 | 12.291 | 12.085 | 14.291 | 13.406 | NA    | NA    | NA    |
| TCGA-DU-A6S2-01A | 14.294 | 13.922 | NA     | NA     | 14.096 | 13.212 | 10.57 | NA    | NA    |
| TCGA-DU-A6S3-01A | 15.153 | 14.781 | 9.5537 | 9.3475 | 12.459 | 11.575 | 8.612 | NA    | 8.671 |
| TCGA-DU-A6S6-01A | 15.597 | 15.225 | 10.756 | 10.55  | NA     | NA     | 11.62 | NA    | 10.87 |
| TCGA-DU-A6S7-01A | 15.264 | 14.892 | NA     | NA     | 12.442 | 11.557 | NA    | NA    | NA    |
| TCGA-DU-A6S8-01A | 13.961 | 13.589 | 9.7057 | 9.4995 | 13.874 | 12.99  | NA    | NA    | 8.823 |
| TCGA-DU-A76K-01A | 14.821 | 14.449 | NA     | NA     | 10.624 | 9.7403 | NA    | NA    | 9.74  |
| TCGA-DU-A76L-01A | 14.913 | 14.541 | 11.104 | 10.898 | 12.519 | 11.634 | NA    | NA    | 8.638 |
| TCGA-DU-A76O-01A | 16.891 | 16.519 | 13.717 | 13.511 | NA     | NA     | NA    | NA    | NA    |
| TCGA-DU-A76R-01A | 15.047 | 14.675 | NA     | NA     | 11.225 | 10.341 | NA    | NA    | 9.342 |
| TCGA-DU-A7T6-01A | 15.329 | 14.957 | NA     | NA     | 12.073 | 11.188 | NA    | NA    | NA    |
| TCGA-DU-A7T8-01A | 14.328 | 13.957 | 10.716 | 10.51  | 13.038 | 12.153 | NA    | NA    | NA    |
| TCGA-DU-A7TA-01A | 15.167 | 14.795 | NA     | NA     | NA     | NA     | NA    | NA    | NA    |
| TCGA-DU-A7TB-01A | 13.491 | 13.119 | NA     | NA     | 12.293 | 11.409 | NA    | NA    | NA    |
| TCGA-DU-A7TC-01A | 16.224 | 15.852 | NA     | 12.704 | NA     | NA     | NA    | NA    | NA    |
| TCGA-DU-A7TD-01A | 13.838 | 13.466 | 9.3939 | 9.1878 | 10.715 | 9.8308 | NA    | NA    | NA    |
| TCGA-DU-A7TG-01A | 13.367 | 12.995 | NA     | NA     | 13.206 | 12.322 | NA    | NA    | 10.21 |
| TCGA-DU-A7TI-01A | 15.222 | 14.85  | 10.025 | 9.8192 | 12.024 | 11.14  | NA    | NA    | NA    |
| TCGA-DU-A7TJ-01A | 16.446 | 16.074 | NA     | NA     | 11.279 | 10.395 | NA    | NA    | NA    |
| TCGA-E1-5302-01A | 14.71  | 14.338 | 13.512 | 13.305 | NA     | NA     | NA    | NA    | NA    |
| TCGA-E1-5303-01A | 11.139 | 10.767 | 11.356 | 11.32  | 15.464 | 14.58  | NA    | NA    | NA    |
| TCGA-E1-5304-01A | 14.006 | 13.635 | 9.81   | 9.6038 | 15.13  | 14.246 | 8.868 | NA    | NA    |
| TCGA-E1-5305-01A | 11.556 | 11.184 | NA     | NA     | 10.721 | 9.8374 | 9.194 | NA    | NA    |
| TCGA-E1-5307-01A | 13.956 | 13.585 | NA     | NA     | 10.537 | 9.6533 | NA    | NA    | NA    |

|                  |        |        |        |        |        |        |       |       |       |
|------------------|--------|--------|--------|--------|--------|--------|-------|-------|-------|
| TCGA-E1-5311-01A | 12.624 | 12.252 | NA     | NA     | 10.427 | 9.5429 | 11.07 | 9.604 | 9.543 |
| TCGA-E1-5318-01A | 13.633 | 13.261 | NA     | NA     | 13.02  | 12.136 | 13.08 | NA    | NA    |
| TCGA-E1-5319-01A | 14.73  | 14.358 | NA     | NA     | 13.03  | 12.146 | NA    | 9.209 | NA    |
| TCGA-E1-5322-01A | 14.001 | 13.629 | NA     | NA     | 12.71  | 11.825 | NA    | NA    | NA    |
| TCGA-E1-A7YD-01A | 12.948 | 12.576 | 7.1163 | 6.9114 | 8.1111 | 7.231  | NA    | NA    | NA    |
| TCGA-E1-A7YE-01A | 16.105 | 15.733 | NA     | NA     | NA     | NA     | NA    | NA    | NA    |
| TCGA-E1-A7YH-01A | 15.983 | 15.611 | 10.727 | 10.52  | 12.726 | 11.842 | 9.784 | NA    | NA    |
| TCGA-E1-A7YI-01A | 15.673 | 15.301 | NA     | NA     | NA     | NA     | NA    | NA    | NA    |
| TCGA-E1-A7YJ-01A | 13.051 | 12.679 | NA     | 11.232 | 13.023 | 12.139 | NA    | NA    | NA    |
| TCGA-E1-A7YK-01A | 13.837 | 13.466 | 10.766 | 10.559 | 15.157 | 14.273 | NA    | NA    | NA    |
| TCGA-E1-A7YL-01A | 13.322 | 12.95  | 11.387 | 12.18  | 13.387 | 12.502 | NA    | 10.56 | NA    |
| TCGA-E1-A7YM-01A | 14.72  | 14.348 | 9.4655 | 9.2593 | 14.593 | 13.708 | NA    | NA    | NA    |
| TCGA-E1-A7YN-01A | 13.083 | 12.711 | NA     | NA     | 11.77  | 10.886 | 7.251 | NA    | 8.305 |
| TCGA-E1-A7YO-01A | 16.52  | 16.148 | 10.4   | 10.194 | 13.858 | 12.974 | NA    | NA    | 9.516 |
| TCGA-E1-A7YQ-01A | 12.759 | 12.387 | 9.6239 | 9.4177 | 13.48  | 12.596 | NA    | NA    | NA    |
| TCGA-E1-A7YS-01A | 16.197 | 15.825 | 11.912 | 11.706 | 13.719 | 12.835 | 9.97  | NA    | NA    |
| TCGA-E1-A7YU-01A | 13.007 | 12.635 | 11.658 | 11.451 | 11.658 | 10.773 | NA    | NA    | NA    |
| TCGA-E1-A7YV-01A | 14.157 | 13.785 | NA     | NA     | 12.606 | 11.722 | NA    | NA    | NA    |
| TCGA-E1-A7YW-01A | 14.747 | 14.375 | NA     | NA     | 12.075 | 11.191 | NA    | NA    | NA    |
| TCGA-E1-A7YY-01A | 15.301 | 14.929 | 11.519 | 11.313 | 13.104 | 12.219 | 11.58 | NA    | 10.63 |
| TCGA-E1-A7Z2-01A | 15.863 | 15.491 | NA     | NA     | NA     | NA     | NA    | NA    | 10.2  |
| TCGA-E1-A7Z3-01A | 14.413 | 14.041 | NA     | NA     | 12.479 | 11.594 | NA    | NA    | NA    |
| TCGA-E1-A7Z4-01A | 12.772 | 12.4   | NA     | NA     | 11.574 | 10.69  | NA    | NA    | NA    |
| TCGA-E1-A7Z6-01A | 14.61  | 14.238 | NA     | NA     | 11.91  | 11.026 | NA    | NA    | NA    |
| TCGA-EZ-7264-01A | 8.8864 | 8.5153 | NA     | NA     | 10.272 | 9.388  | 8.331 | NA    | NA    |
| TCGA-F6-A8O3-01A | 14.921 | 14.549 | NA     | NA     | 9.2661 | 8.3836 | NA    | NA    | NA    |
| TCGA-F6-A8O4-01A | 11.237 | 10.866 | 7.875  | 7.6695 | 6.8812 | 6.007  | NA    | NA    | NA    |
| TCGA-FG-5962-01B | 10.88  | 10.508 | NA     | NA     | 9.0985 | 8.2162 | NA    | NA    | 8.8   |
| TCGA-FG-5963-01A | 14.294 | 13.922 | 4.9681 | 4.7688 | 7.9272 | 7.5042 | 8.304 | 5.14  | 5.651 |
| TCGA-FG-5964-01A | 15.291 | 14.919 | NA     | NA     | NA     | NA     | NA    | NA    | 8.819 |
| TCGA-FG-5965-01B | 16.028 | 15.657 | NA     | NA     | 8.9427 | 8.0607 | 8.999 | NA    | 8.061 |
| TCGA-FG-6688-01A | 8.249  | 7.8785 | NA     | NA     | 9.6331 | 8.7501 | NA    | NA    | NA    |
| TCGA-FG-6689-01A | 10.446 | 10.074 | 10.418 | 10.211 | 9.8332 | 8.9501 | 8.891 | NA    | NA    |
| TCGA-FG-6690-01A | 10.737 | 10.366 | NA     | NA     | NA     | NA     | 9.183 | NA    | 9.241 |
| TCGA-FG-6691-01A | 10.075 | 9.703  | 9.8768 | 10.67  | 12.046 | 11.161 | 7.938 | NA    | NA    |
| TCGA-FG-6692-01A | 10.062 | 9.6906 | 8.4519 | 8.8295 | 9.0355 | 8.1533 | 8.829 | NA    | 6.578 |
| TCGA-FG-7634-01A | 7.7285 | 7.3585 | NA     | NA     | 8.1139 | 7.2338 | NA    | NA    | NA    |
| TCGA-FG-7636-01A | 15.466 | 15.094 | 9.4623 | 9.2561 | 11.783 | 10.898 | 8.521 | NA    | NA    |
| TCGA-FG-7637-01A | 16.147 | 15.775 | NA     | NA     | 13.693 | 12.808 | NA    | NA    | NA    |
| TCGA-FG-7638-01B | 10.251 | 9.8793 | NA     | NA     | 9.0545 | 8.1723 | NA    | NA    | NA    |
| TCGA-FG-7641-01B | 10.612 | 10.241 | NA     | NA     | 8.6799 | 7.7984 | NA    | NA    | 7.798 |
| TCGA-FG-7643-01A | 15.297 | 14.925 | NA     | NA     | 12.225 | 11.341 | 9.283 | NA    | NA    |
| TCGA-FG-8181-01A | 10.044 | 9.6721 | 8.2641 | 8.0584 | 10.068 | 9.1847 | 7.325 | NA    | 7.384 |
| TCGA-FG-8182-01A | 10.542 | 10.17  | 10.665 | 10.459 | 11.343 | 10.459 | NA    | NA    | 7.466 |
| TCGA-FG-8185-01A | 11.019 | 10.647 | NA     | NA     | NA     | NA     | NA    | NA    | NA    |
| TCGA-FG-8186-01A | 8.491  | 8.1202 | 7.8801 | 7.6746 | 8.877  | 7.9951 | NA    | NA    | NA    |
| TCGA-FG-8187-01A | 10.317 | 9.9454 | 8.1231 | 7.9175 | 11.288 | 10.404 | 7.184 | NA    | NA    |
| TCGA-FG-8188-01A | 15.821 | 15.449 | 9.9802 | 9.774  | 10.98  | 10.096 | NA    | 8.161 | NA    |
| TCGA-FG-8189-01B | 11.922 | 11.55  | 13.309 | 13.102 | 13.894 | 13.009 | NA    | NA    | NA    |
| TCGA-FG-8191-01A | 8.9664 | 8.5952 | 9.3527 | 9.8825 | 10.352 | 9.468  | NA    | 7.948 | NA    |
| TCGA-FG-A4MU-01B | 13.718 | 13.346 | 11.427 | 11.221 | 11.105 | 10.221 | NA    | NA    | NA    |
| TCGA-FG-A4MW-01A | 13.792 | 13.42  | 10.957 | 10.751 | 13.693 | 12.809 | NA    | NA    | 8.491 |
| TCGA-FG-A4MX-01A | 13.599 | 13.227 | 9.5953 | 9.3892 | 15.559 | 14.675 | NA    | NA    | NA    |

|                  |        |        |        |        |        |        |       |       |       |
|------------------|--------|--------|--------|--------|--------|--------|-------|-------|-------|
| TCGA-FG-A4MY-01A | 14.222 | 13.85  | 12.439 | 12.233 | 16.024 | 15.139 | NA    | NA    | NA    |
| TCGA-FG-A60J-01A | 15.269 | 14.897 | NA     | NA     | 13.112 | 12.227 | 9.585 | NA    | 9.644 |
| TCGA-FG-A60K-01A | 13.67  | 13.298 | NA     | NA     | 12.182 | 11.298 | NA    | NA    | NA    |
| TCGA-FG-A60L-01A | 13.825 | 13.453 | NA     | NA     | 14.424 | 13.539 | NA    | NA    | NA    |
| TCGA-FG-A6IZ-01A | 13.542 | 13.17  | 10.708 | 10.501 | 11.122 | 10.238 | 8.183 | NA    | NA    |
| TCGA-FG-A6J1-01A | 13.277 | 12.906 | NA     | NA     | 14.13  | 13.246 | NA    | NA    | 8.392 |
| TCGA-FG-A6J3-01A | 12.899 | 12.527 | 9.2012 | 9.9937 | 11.521 | 10.637 | NA    | NA    | NA    |
| TCGA-FG-A70Y-01A | 16.249 | 15.877 | NA     | NA     | 12.408 | 11.523 | 11.46 | NA    | NA    |
| TCGA-FG-A70Z-01A | 15.336 | 14.964 | 9.7025 | 9.4963 | 10.702 | 9.8179 | NA    | NA    | NA    |
| TCGA-FG-A710-01A | 15.286 | 14.914 | 10.182 | 9.9757 | 10.182 | 9.2985 | NA    | NA    | NA    |
| TCGA-FG-A711-01A | 15.644 | 15.272 | NA     | NA     | 11.173 | 10.289 | 10.23 | NA    | NA    |
| TCGA-FG-A713-01A | 15.055 | 14.683 | NA     | NA     | 13.725 | 12.841 | NA    | 10.1  | NA    |
| TCGA-FG-A87N-01A | 16.079 | 15.707 | NA     | NA     | 10.338 | 9.4544 | 10.39 | NA    | NA    |
| TCGA-FG-A87Q-01A | 14.479 | 14.107 | 9.9603 | 9.754  | 11.959 | 11.075 | NA    | NA    | NA    |
| TCGA-FN-7833-01A | 16.077 | 15.705 | 8.9912 | 8.7852 | 8.9912 | 8.1091 | NA    | 8.17  | NA    |
| TCGA-HT-7467-01A | 13.879 | 13.507 | 11.588 | 11.382 | 12.725 | 11.841 | 9.324 | NA    | 8.385 |
| TCGA-HT-7468-01A | 9.1348 | 8.7636 | NA     | NA     | 10.106 | 9.2221 | NA    | NA    | NA    |
| TCGA-HT-7469-01A | 15.25  | 14.878 | NA     | NA     | 8.8583 | 7.9764 | 10.72 | NA    | 7.976 |
| TCGA-HT-7470-01A | 15.694 | 15.322 | NA     | NA     | 11.159 | 10.275 | 8.633 | NA    | NA    |
| TCGA-HT-7471-01A | 16.203 | 15.831 | NA     | NA     | 11.029 | 10.145 | 8.09  | NA    | NA    |
| TCGA-HT-7472-01A | 11.81  | 11.438 | 9.8759 | 9.6697 | 10.875 | 9.9913 | 8.934 | NA    | NA    |
| TCGA-HT-7473-01A | 14.742 | 14.37  | NA     | NA     | 9.3761 | 8.4934 | 10.43 | NA    | NA    |
| TCGA-HT-7474-01A | 10.778 | 10.406 | NA     | NA     | 10.58  | 9.6965 | 8.639 | NA    | NA    |
| TCGA-HT-7475-01A | 12.773 | 12.401 | NA     | NA     | 10.353 | 9.4698 | 10.87 | NA    | 11.28 |
| TCGA-HT-7476-01A | 15.498 | 15.126 | 10.176 | 9.97   | 12.497 | 11.613 | 10.82 | NA    | 12.1  |
| TCGA-HT-7477-01B | 12.981 | 12.609 | NA     | NA     | 12.046 | 11.162 | NA    | NA    | NA    |
| TCGA-HT-7478-01A | 11.054 | 10.682 | NA     | NA     | 12.44  | 11.556 | NA    | NA    | NA    |
| TCGA-HT-7479-01A | 13.875 | 13.503 | 10.356 | 10.15  | 12.814 | 11.93  | 8.416 | NA    | NA    |
| TCGA-HT-7480-01A | 17.501 | 17.129 | 12.397 | 12.19  | NA     | NA     | NA    | NA    | NA    |
| TCGA-HT-7481-01A | 14.347 | 13.975 | 10.565 | 10.359 | 14.319 | 13.435 | 8.624 | NA    | 8.683 |
| TCGA-HT-7482-01A | 11.612 | 11.24  | NA     | NA     | 10.263 | 9.3792 | 9.735 | NA    | NA    |
| TCGA-HT-7483-01A | 11.455 | 11.083 | NA     | NA     | 10.62  | 9.7359 | 9.677 | NA    | 8.154 |
| TCGA-HT-7485-01A | 15.395 | 15.023 | 9.4444 | 10.237 | 10.443 | 9.5597 | 8.503 | NA    | 8.562 |
| TCGA-HT-7601-01A | 15.715 | 15.343 | 10.984 | 11.1   | 13.739 | 12.854 | NA    | NA    | NA    |
| TCGA-HT-7602-01A | 9.1229 | 8.7517 | NA     | NA     | 12.093 | 11.208 | NA    | NA    | NA    |
| TCGA-HT-7603-01A | 16.175 | 15.803 | NA     | NA     | 11.289 | 10.405 | NA    | 9.882 | 9.821 |
| TCGA-HT-7604-01A | 10.494 | 10.122 | NA     | NA     | NA     | NA     | NA    | NA    | NA    |
| TCGA-HT-7605-01A | 16.3   | 15.928 | 9.0599 | 9.8523 | 9.0599 | 8.1777 | 8.119 | 8.239 | 9.175 |
| TCGA-HT-7606-01A | 9.3174 | 8.9461 | NA     | NA     | NA     | NA     | NA    | NA    | NA    |
| TCGA-HT-7607-01A | 10.706 | 10.334 | NA     | NA     | 9.509  | 8.6261 | NA    | NA    | NA    |
| TCGA-HT-7608-01A | 9.9821 | 9.6105 | NA     | NA     | 10.369 | 9.4852 | NA    | NA    | NA    |
| TCGA-HT-7609-01A | 10.134 | 9.7628 | 8.9381 | 8.7321 | 10.521 | 9.6374 | NA    | NA    | NA    |
| TCGA-HT-7610-01A | 15.066 | 14.694 | 9.3677 | 9.1616 | 11.688 | 10.804 | 8.426 | NA    | 9.483 |
| TCGA-HT-7611-01A | 15.065 | 14.693 | 9.3247 | 9.1186 | 12.782 | 11.898 | 9.381 | NA    | NA    |
| TCGA-HT-7616-01A | 8.845  | 8.474  | 6.6583 | 6.454  | 10.452 | 9.5687 | 7.707 | NA    | NA    |
| TCGA-HT-7620-01A | 11.36  | 10.988 | 8.051  | 7.8454 | 8.051  | 7.1711 | 9.105 | NA    | NA    |
| TCGA-HT-7676-01A | 11.15  | 10.778 | NA     | NA     | 9.337  | 8.4544 | 9.772 | NA    | 6.149 |
| TCGA-HT-7677-01A | 16.565 | 16.193 | NA     | NA     | 8.9273 | 8.0453 | 10.79 | NA    | 8.045 |
| TCGA-HT-7680-01A | 14.135 | 13.764 | 9.3414 | 9.1353 | 10.755 | 9.8712 | 7.817 | NA    | NA    |
| TCGA-HT-7681-01A | 10.902 | 10.531 | 9.9683 | 9.762  | 13.137 | 12.253 | 9.026 | NA    | 8.088 |
| TCGA-HT-7684-01A | 9.7395 | 9.368  | NA     | 8.3379 | 10.541 | 9.6571 | NA    | NA    | NA    |
| TCGA-HT-7686-01A | 11.143 | 10.771 | 9.6567 | 9.865  | 13.355 | 12.471 | 8.715 | NA    | NA    |
| TCGA-HT-7687-01A | 9.1537 | 8.7825 | 9.5401 | 9.6555 | 11.626 | 10.742 | NA    | NA    | 7.661 |

|                  |        |        |        |        |        |        |       |       |       |
|------------------|--------|--------|--------|--------|--------|--------|-------|-------|-------|
| TCGA-HT-7688-01A | 16.106 | 15.734 | 10.295 | 10.089 | 11.616 | 10.732 | 8.355 | NA    | 9.411 |
| TCGA-HT-7689-01A | 10.818 | 10.446 | 8.2093 | 8.0036 | 9.791  | 8.9079 | 8.266 | NA    | NA    |
| TCGA-HT-7690-01A | 11.152 | 10.781 | NA     | NA     | 8.0847 | 7.2047 | 8.724 | NA    | NA    |
| TCGA-HT-7691-01A | 10.437 | 10.066 | 8.5053 | 8.2994 | 9.0889 | 8.2066 | 9.56  | NA    | NA    |
| TCGA-HT-7692-01A | 14.831 | 14.459 | NA     | NA     | 11.089 | 10.205 | 7.568 | NA    | NA    |
| TCGA-HT-7693-01A | 15.058 | 14.686 | NA     | NA     | 10.861 | 9.977  | 8.599 | NA    | 7.661 |
| TCGA-HT-7694-01A | 14.665 | 14.293 | 7.7189 | 7.5135 | 9.2993 | 8.4167 | 7.775 | NA    | 9.415 |
| TCGA-HT-7695-01A | 15.762 | 15.39  | 9.1073 | 8.9012 | 12.427 | 11.543 | 8.166 | NA    | 10.22 |
| TCGA-HT-7854-01A | 15.887 | 15.515 | 9.1788 | 8.9728 | 11.762 | 10.878 | 8.238 | NA    | 9.878 |
| TCGA-HT-7855-01A | 15.092 | 14.72  | NA     | NA     | 13.374 | 12.49  | 9.112 | NA    | NA    |
| TCGA-HT-7856-01A | 11.374 | 11.002 | 7.7669 | 7.5615 | 11.346 | 10.462 | 8.82  | NA    | 7.882 |
| TCGA-HT-7857-01A | 12.42  | 12.048 | 9.6196 | 9.9103 | 12.16  | 11.29  | 4.646 | NA    | NA    |
| TCGA-HT-7858-01A | 9.3973 | 9.026  | NA     | 6.2726 | 10.047 | 9.1633 | NA    | NA    | 5.606 |
| TCGA-HT-7860-01A | 15.752 | 15.38  | 9.6328 | 9.4267 | 8.6346 | 7.7532 | NA    | 8.811 | 7.753 |
| TCGA-HT-7873-01B | 14.955 | 14.583 | NA     | 8.7635 | NA     | NA     | 11.02 | NA    | 9.085 |
| TCGA-HT-7874-01A | 11.603 | 11.231 | 9.9907 | 9.7844 | 11.312 | 10.428 | NA    | NA    | 9.107 |
| TCGA-HT-7875-01A | 16.615 | 16.243 | 9.3464 | 9.1403 | 10.93  | 10.046 | NA    | NA    | NA    |
| TCGA-HT-7877-01A | 15.542 | 15.17  | NA     | NA     | 11.305 | 10.421 | 9.778 | NA    | 10.42 |
| TCGA-HT-7879-01A | 15.707 | 15.335 | 8.4044 | 8.1986 | 8.4044 | 7.5234 | 11.04 | NA    | 7.523 |
| TCGA-HT-7880-01A | 15.516 | 15.144 | NA     | NA     | 11.788 | 10.904 | 11.13 | NA    | 10.73 |
| TCGA-HT-7881-01A | 11.47  | 11.098 | NA     | 7.6575 | 9.8583 | 8.9751 | 9.5   | NA    | 7.978 |
| TCGA-HT-7882-01A | 15.964 | 15.592 | NA     | 10.907 | 9.1152 | 8.2329 | 10.49 | NA    | NA    |
| TCGA-HT-7884-01B | 14.591 | 14.219 | NA     | NA     | 8.8516 | 7.9697 | 11.71 | NA    | 7.97  |
| TCGA-HT-7902-01A | 10.689 | 10.317 | 8.9622 | 8.7562 | 10.545 | 9.6616 | 8.021 | NA    | 6.506 |
| TCGA-HT-8010-01A | 15.327 | 14.955 | 9.4493 | 9.2432 | 11.77  | 10.885 | NA    | NA    | 9.565 |
| TCGA-HT-8011-01A | 15.456 | 15.085 | 11.181 | 11.39  | 9.5974 | 8.7144 | NA    | NA    | NA    |
| TCGA-HT-8012-01A | 16.473 | 16.101 | 9.1898 | 8.9837 | 12.358 | 11.473 | 9.83  | NA    | 8.307 |
| TCGA-HT-8013-01A | 11.238 | 10.867 | NA     | NA     | 11.532 | 10.648 | 8.271 | NA    | NA    |
| TCGA-HT-8015-01B | 13.897 | 13.525 | NA     | NA     | 15.073 | 14.188 | NA    | NA    | NA    |
| TCGA-HT-8018-01A | 9.54   | 9.1686 | 8.514  | 8.7221 | 10.511 | 9.6274 | NA    | NA    | 6.062 |
| TCGA-HT-8019-01A | 14.987 | 14.615 | NA     | 9.4413 | 12.346 | 11.462 | 7.709 | NA    | 11.76 |
| TCGA-HT-8104-01A | 14.163 | 13.791 | 10.743 | 10.537 | 10.743 | 9.8595 | 10.8  | 8.922 | 8.861 |
| TCGA-HT-8105-01A | 10.333 | 9.9615 | NA     | NA     | 11.135 | 10.251 | NA    | NA    | 9.252 |
| TCGA-HT-8107-01A | 12.234 | 11.862 | 8.9235 | 8.7175 | 11.243 | 10.359 | 9.979 | NA    | 10.84 |
| TCGA-HT-8108-01A | 15.406 | 15.034 | 8.4658 | 9.2576 | 11.047 | 10.163 | 11.1  | NA    | 7.585 |
| TCGA-HT-8109-01A | 16.191 | 15.819 | NA     | NA     | 10.636 | 9.7525 | 9.694 | NA    | 10.56 |
| TCGA-HT-8110-01A | 12.647 | 12.275 | 6.0555 | 5.8524 | 7.0447 | 6.1694 | NA    | NA    | NA    |
| TCGA-HT-8111-01A | 11.05  | 10.678 | NA     | 6.8502 | 9.853  | 8.9698 | 8.911 | NA    | 7.17  |
| TCGA-HT-8113-01A | 10.853 | 10.482 | 8.9206 | 8.7146 | 11.918 | 11.034 | NA    | NA    | 9.62  |
| TCGA-HT-8114-01A | 15.842 | 15.47  | 9.9085 | 9.7023 | 12.229 | 11.345 | 11.55 | NA    | NA    |
| TCGA-HT-8558-01A | 10.776 | 10.405 | NA     | NA     | NA     | NA     | 7.641 | NA    | 8.697 |
| TCGA-HT-8563-01A | 13.505 | 13.133 | 9.3227 | 9.4057 | 12.034 | 11.149 | 8.381 | NA    | 7.857 |
| TCGA-HT-8564-01A | 10.43  | 10.058 | NA     | NA     | 8.7038 | 7.8222 | 8.177 | NA    | 7.24  |
| TCGA-HT-A4DS-01A | 14.298 | 13.926 | NA     | NA     | 11.948 | 11.064 | 10.42 | NA    | NA    |
| TCGA-HT-A4DV-01A | 14.143 | 13.771 | 8.9482 | 8.7422 | 13.193 | 12.309 | NA    | NA    | NA    |
| TCGA-HT-A5R5-01A | 14.288 | 13.917 | NA     | NA     | 12.506 | 11.621 | 8.98  | NA    | NA    |
| TCGA-HT-A5R7-01A | 13.922 | 13.55  | 11.724 | 11.518 | 13.531 | 12.647 | NA    | NA    | 11.42 |
| TCGA-HT-A5R9-01A | 12.608 | 12.236 | 12.995 | 12.788 | NA     | NA     | NA    | NA    | NA    |
| TCGA-HT-A5RA-01A | 13.347 | 12.975 | 10.413 | 10.207 | 11.412 | 10.528 | 9.471 | NA    | NA    |
| TCGA-HT-A5RB-01A | 13.63  | 13.258 | NA     | NA     | 13.21  | 12.325 | NA    | NA    | NA    |
| TCGA-HT-A5RC-01A | 13.238 | 12.866 | 11.626 | 11.419 | 13.947 | 13.063 | NA    | NA    | NA    |
| TCGA-HT-A614-01A | 15.678 | 15.306 | NA     | NA     | NA     | NA     | NA    | NA    | NA    |
| TCGA-HT-A615-01A | 13.197 | 12.825 | 11     | 10.793 | NA     | NA     | 10.06 | NA    | NA    |

|                  |        |        |        |        |        |        |       |       |       |
|------------------|--------|--------|--------|--------|--------|--------|-------|-------|-------|
| TCGA-HT-A616-01A | 12.999 | 12.627 | 13.386 | 13.179 | 14.971 | 14.086 | NA    | NA    | NA    |
| TCGA-HT-A617-01A | 12.646 | 12.274 | NA     | NA     | 14.518 | 13.634 | 9.769 | NA    | NA    |
| TCGA-HT-A618-01A | 11.392 | 11.021 | 9.4589 | 9.2528 | 11.779 | 10.895 | 8.517 | NA    | NA    |
| TCGA-HT-A619-01A | 14.306 | 13.934 | NA     | NA     | 11.787 | 10.903 | 10.84 | NA    | 10.9  |
| TCGA-HT-A61A-01A | 12.648 | 12.277 | NA     | NA     | 13.62  | 12.736 | NA    | NA    | 11.74 |
| TCGA-HT-A61B-01A | 12.225 | 11.853 | NA     | NA     | 13.612 | 12.727 | 8.864 | NA    | NA    |
| TCGA-HT-A61C-01A | 14.035 | 13.663 | 12.007 | 12.215 | 13.229 | 12.345 | NA    | NA    | NA    |
| TCGA-HT-A74H-01A | 14.567 | 14.195 | 10.049 | 9.8424 | 10.049 | 9.1653 | 9.107 | NA    | NA    |
| TCGA-HT-A74K-01A | 15.275 | 14.903 | 10.171 | 9.9648 | 14.418 | 13.533 | 9.229 | NA    | 9.288 |
| TCGA-HT-A74L-01A | 15.462 | 15.09  | NA     | NA     | 10.873 | 9.989  | NA    | NA    | NA    |
| TCGA-HT-A74O-01A | 14.868 | 14.496 | NA     | NA     | 14.151 | 13.267 | 9.887 | NA    | NA    |
| TCGA-HW-7486-01A | 10.867 | 10.495 | 8.9341 | 9.4637 | 11.517 | 10.633 | 7.411 | 6.539 | 6.478 |
| TCGA-HW-7487-01A | 12.204 | 11.832 | NA     | NA     | NA     | NA     | 11.33 | NA    | NA    |
| TCGA-HW-7489-01A | 14.172 | 13.8   | 10.036 | 9.8302 | 11.036 | 10.152 | 9.094 | NA    | 9.153 |
| TCGA-HW-7490-01A | 13.784 | 13.412 | NA     | NA     | NA     | NA     | NA    | NA    | NA    |
| TCGA-HW-7491-01A | 7.7406 | 7.3706 | NA     | NA     | 10.444 | 9.5602 | NA    | NA    | NA    |
| TCGA-HW-7493-01A | 14.541 | 14.169 | 8.4242 | 8.2184 | 10.421 | 9.859  | NA    | NA    | NA    |
| TCGA-HW-7495-01A | 9.6875 | 9.3161 | NA     | NA     | 9.0755 | 8.1932 | 8.135 | NA    | NA    |
| TCGA-HW-8319-01A | 14.938 | 14.566 | NA     | NA     | 10.607 | 9.7231 | 11.08 | NA    | 9.723 |
| TCGA-HW-8320-01A | 10.483 | 10.111 | NA     | NA     | NA     | NA     | NA    | 6.888 | NA    |
| TCGA-HW-8321-01A | 16.349 | 15.977 | NA     | 8.6085 | 11.397 | 10.513 | 8.871 | NA    | 7.933 |
| TCGA-HW-8322-01A | 10.132 | 9.7607 | 7.939  | 8.73   | 10.934 | 10.05  | 8.578 | NA    | 8.054 |
| TCGA-HW-A5KJ-01A | 12.82  | 12.448 | 9.886  | 9.6798 | 15.344 | 14.459 | 9.943 | NA    | NA    |
| TCGA-HW-A5KK-01A | 13.891 | 13.519 | 11.279 | 11.072 | 15.366 | 14.481 | NA    | NA    | NA    |
| TCGA-HW-A5KL-01A | 14.573 | 14.201 | 12.79  | 12.806 | NA     | NA     | NA    | NA    | NA    |
| TCGA-HW-A5KM-01A | 14.04  | 13.668 | 11.956 | 11.749 | 16.502 | 15.617 | NA    | NA    | NA    |
| TCGA-IK-7675-01A | 10.679 | 10.307 | 8.7465 | 8.5405 | 8.7465 | 7.8648 | 9.801 | NA    | NA    |
| TCGA-IK-8125-01A | 10.291 | 9.919  | 8.68   | 8.4741 | 9.6783 | 8.7953 | 7.74  | NA    | NA    |
| TCGA-KT-A74X-01A | 14.943 | 14.571 | 10.687 | 10.481 | 11.102 | 10.218 | 11.16 | NA    | NA    |
| TCGA-KT-A7W1-01A | 14.4   | 14.028 | 13.929 | 13.81  | 13.836 | 12.952 | NA    | NA    | NA    |
| TCGA-P5-A5ET-01A | 14.18  | 13.808 | 11.508 | 11.302 | 14.567 | 13.682 | 8.982 | NA    | 9.041 |
| TCGA-P5-A5EU-01A | 13.672 | 13.3   | 11.557 | 11.351 | 15.557 | 14.672 | NA    | NA    | NA    |
| TCGA-P5-A5EV-01A | 14.299 | 13.927 | 11.317 | 11.333 | 14.776 | 13.892 | 7.795 | NA    | NA    |
| TCGA-P5-A5EW-01A | 13.547 | 13.175 | NA     | NA     | 14.403 | 13.519 | NA    | NA    | NA    |
| TCGA-P5-A5EX-01A | 12.786 | 12.414 | 9.0602 | 8.8541 | 12.058 | 11.174 | NA    | NA    | 6.603 |
| TCGA-P5-A5EY-01A | 12.96  | 12.588 | 9.8892 | 9.6829 | 16.154 | 15.27  | 8.947 | NA    | 9.006 |
| TCGA-P5-A5EZ-01A | 11.582 | 11.21  | 11.121 | 10.915 | 14.753 | 13.869 | NA    | NA    | NA    |
| TCGA-P5-A5F0-01A | 14.397 | 14.025 | 11.562 | 11.355 | 13.677 | 12.792 | 9.036 | NA    | 10.09 |
| TCGA-P5-A5F1-01A | 17.272 | 16.9   | NA     | NA     | NA     | NA     | NA    | NA    | NA    |
| TCGA-P5-A5F2-01A | 12.645 | 12.273 | NA     | NA     | 14.032 | 13.148 | NA    | NA    | NA    |
| TCGA-P5-A5F4-01A | 16.826 | 16.454 | NA     | NA     | NA     | NA     | NA    | NA    | NA    |
| TCGA-P5-A5F6-01A | 10.556 | 10.184 | 11.205 | 10.999 | 11.62  | 10.906 | NA    | NA    | NA    |
| TCGA-P5-A72U-01A | 14.601 | 14.229 | 10.902 | 10.695 | NA     | NA     | 9.959 | NA    | NA    |
| TCGA-P5-A72W-01A | 13.6   | 13.228 | NA     | NA     | 12.987 | 12.103 | 8.463 | NA    | NA    |
| TCGA-P5-A72X-01A | 15.351 | 14.979 | NA     | NA     | 11.057 | 10.173 | 8.532 | NA    | 10.17 |
| TCGA-P5-A72Z-01A | 15.385 | 15.013 | NA     | NA     | 10.729 | 9.8449 | 9.786 | NA    | NA    |
| TCGA-P5-A730-01A | 15.568 | 15.196 | NA     | NA     | 13.613 | 12.728 | 9.863 | NA    | 8.924 |
| TCGA-P5-A731-01A | 13.999 | 13.627 | 10.579 | 11.373 | NA     | NA     | NA    | NA    | NA    |
| TCGA-P5-A733-01A | 15.824 | 15.452 | 8.7303 | 8.5243 | 10.728 | 9.8439 | NA    | NA    | NA    |
| TCGA-P5-A735-01A | 17.629 | 17.257 | NA     | NA     | NA     | NA     | NA    | NA    | NA    |
| TCGA-P5-A736-01A | 14.267 | 13.895 | NA     | NA     | 12.484 | 11.6   | 10.54 | NA    | 11.6  |
| TCGA-P5-A737-01A | 12.163 | 11.791 | 8.7459 | 8.54   | 12.743 | 11.858 | NA    | NA    | NA    |
| TCGA-P5-A77W-01A | 15.386 | 15.014 | NA     | NA     | 12.826 | 11.941 | 10.4  | NA    | 9.136 |

|                  |        |        |        |        |        |        |       |       |       |
|------------------|--------|--------|--------|--------|--------|--------|-------|-------|-------|
| TCGA-P5-A77X-01A | 14.721 | 14.349 | 11.234 | 11.028 | 13.556 | 12.672 | 9.707 | NA    | 10.35 |
| TCGA-P5-A780-01A | 15.259 | 14.887 | NA     | 9.7406 | 14.945 | 14.061 | 9.005 | NA    | 9.063 |
| TCGA-P5-A781-01A | 14.791 | 14.419 | 11.534 | 11.328 | 13.704 | 12.82  | 9.592 | NA    | NA    |
| TCGA-QH-A65R-01A | 13.786 | 13.414 | 11.851 | 11.645 | 14.253 | 13.369 | NA    | NA    | NA    |
| TCGA-QH-A65S-01A | 13.577 | 13.205 | NA     | NA     | 13.812 | 12.927 | NA    | NA    | NA    |
| TCGA-QH-A65V-01A | 14.749 | 14.377 | NA     | NA     | 14.037 | 13.152 | NA    | NA    | NA    |
| TCGA-QH-A65X-01A | 16.914 | 16.542 | NA     | NA     | 12.842 | 11.958 | 9.316 | NA    | 9.375 |
| TCGA-QH-A65Z-01A | 13.698 | 13.326 | NA     | NA     | 14.223 | 13.338 | 9.821 | NA    | NA    |
| TCGA-QH-A6CS-01A | 14.237 | 13.865 | 12.039 | 11.833 | 15.498 | 14.614 | NA    | NA    | NA    |
| TCGA-QH-A6CU-01A | 14.551 | 14.179 | 11.238 | 11.616 | 11.238 | 10.354 | NA    | NA    | NA    |
| TCGA-QH-A6CV-01A | 13.67  | 13.298 | 11.969 | 11.763 | 15.014 | 14.129 | NA    | NA    | NA    |
| TCGA-QH-A6CX-01A | 12.877 | 12.505 | 7.5436 | 7.3383 | 10.859 | 9.9747 | NA    | NA    | NA    |
| TCGA-QH-A6CY-01A | 14.296 | 13.924 | NA     | NA     | 12.277 | 11.393 | NA    | NA    | NA    |
| TCGA-QH-A6CZ-01A | 18.387 | 18.016 | 12.527 | 12.32  | NA     | NA     | NA    | NA    | NA    |
| TCGA-QH-A6X3-01A | 16.509 | 16.137 | NA     | 8.9709 | 10.76  | 9.8765 | NA    | 8.356 | NA    |
| TCGA-QH-A6X4-01A | 17.048 | 16.676 | 11.188 | 10.981 | NA     | NA     | NA    | NA    | NA    |
| TCGA-QH-A6X5-01A | 14.34  | 13.968 | 10.955 | 11.164 | 12.37  | 11.486 | NA    | NA    | NA    |
| TCGA-QH-A6X8-01A | 15.838 | 15.466 | 10.295 | 10.089 | 12.294 | 11.41  | NA    | NA    | NA    |
| TCGA-QH-A6X9-01A | 14.093 | 13.721 | 10.574 | 10.367 | 12.573 | 11.689 | NA    | NA    | NA    |
| TCGA-QH-A6XA-01A | 14.486 | 14.114 | NA     | NA     | 10.873 | 9.9895 | NA    | NA    | NA    |
| TCGA-QH-A6XC-01A | 15.258 | 14.886 | 9.5384 | 9.3323 | 12.707 | 11.822 | NA    | NA    | NA    |
| TCGA-QH-A86X-01A | 15.222 | 14.85  | 9.2535 | 9.0474 | 9.2535 | 8.371  | NA    | NA    | NA    |
| TCGA-QH-A870-01A | 15.565 | 15.193 | NA     | NA     | 10.239 | 9.3558 | NA    | NA    | 8.358 |
| TCGA-R8-A6MK-01A | 15.505 | 15.133 | 10.192 | 9.9862 | 11.192 | 10.308 | NA    | NA    | NA    |
| TCGA-R8-A6ML-01A | 15.649 | 15.277 | NA     | NA     | 10.545 | 9.6613 | NA    | NA    | 9.661 |
| TCGA-R8-A6MO-01A | 16.139 | 15.767 | NA     | NA     | NA     | NA     | NA    | NA    | NA    |
| TCGA-R8-A6YH-01A | 15.578 | 15.206 | NA     | NA     | 11.011 | 10.127 | NA    | NA    | NA    |
| TCGA-R8-A73M-01A | 15.399 | 15.028 | NA     | NA     | 11.202 | 10.318 | NA    | 9.381 | NA    |
| TCGA-RY-A83X-01A | 16.005 | 15.633 | NA     | 10.017 | NA     | NA     | 9.281 | NA    | 10.34 |
| TCGA-RY-A83Y-01A | 14.617 | 14.245 | NA     | NA     | 9.6311 | 8.7481 | 9.273 | NA    | 7.751 |
| TCGA-RY-A83Z-01A | 15.821 | 15.449 | NA     | NA     | 11.609 | 10.725 | 11.25 | NA    | 9.726 |
| TCGA-RY-A840-01A | 15.943 | 15.571 | NA     | NA     | 11.63  | 10.746 | NA    | NA    | 8.165 |
| TCGA-RY-A843-01A | 16.661 | 16.289 | NA     | NA     | NA     | NA     | NA    | NA    | NA    |
| TCGA-RY-A845-01A | 14.909 | 14.537 | NA     | NA     | 10.542 | 9.6582 | 9.599 | NA    | NA    |
| TCGA-RY-A847-01A | 10.556 | 10.184 | 7.7782 | 7.8346 | 9.4518 | 8.569  | NA    | NA    | NA    |
| TCGA-S9-A6TS-01A | 16.928 | 16.556 | NA     | NA     | NA     | NA     | NA    | NA    | NA    |
| TCGA-S9-A6TU-01A | 14.045 | 13.673 | 10.389 | 10.182 | 13.973 | 13.088 | NA    | NA    | NA    |
| TCGA-S9-A6TV-01A | 15.484 | 15.112 | NA     | NA     | 10.989 | 10.105 | 10.63 | NA    | NA    |
| TCGA-S9-A6TW-01A | 15.377 | 15.005 | NA     | NA     | 12.35  | 11.465 | 11.14 | NA    | NA    |
| TCGA-S9-A6TX-01A | 15.528 | 15.156 | 10.425 | 10.218 | 13.424 | 12.539 | NA    | NA    | NA    |
| TCGA-S9-A6TY-01A | 15.167 | 14.795 | NA     | NA     | 12.467 | 11.583 | NA    | NA    | NA    |
| TCGA-S9-A6TZ-01A | 15.153 | 14.781 | NA     | NA     | 12.84  | 11.955 | NA    | NA    | NA    |
| TCGA-S9-A6U0-01A | 14.277 | 13.905 | 11.416 | 11.532 | 12.875 | 11.991 | NA    | NA    | NA    |
| TCGA-S9-A6U1-01A | 18.121 | 17.749 | NA     | NA     | NA     | NA     | NA    | NA    | NA    |
| TCGA-S9-A6U2-01A | 16.044 | 15.672 | NA     | NA     | 10.788 | 9.9045 | NA    | NA    | NA    |
| TCGA-S9-A6U5-01A | 18.602 | 18.23  | NA     | NA     | NA     | NA     | NA    | NA    | NA    |
| TCGA-S9-A6U6-01A | 14.558 | 14.186 | NA     | NA     | 12.576 | 11.691 | NA    | NA    | NA    |
| TCGA-S9-A6U8-01A | 15.341 | 14.969 | NA     | NA     | 12.028 | 11.144 | NA    | NA    | NA    |
| TCGA-S9-A6U9-01A | 15.263 | 14.891 | NA     | NA     | NA     | NA     | NA    | NA    | NA    |
| TCGA-S9-A6UA-01A | 13.538 | 13.166 | NA     | NA     | 14.588 | 13.703 | 9.399 | NA    | 9.457 |
| TCGA-S9-A6UB-01A | 16.237 | 15.865 | 11.303 | 11.096 | 11.303 | 10.419 | NA    | NA    | NA    |
| TCGA-S9-A6WD-01A | 15.145 | 14.773 | 10.626 | 10.419 | 13.21  | 12.326 | NA    | NA    | NA    |
| TCGA-S9-A6WE-01A | 14.715 | 14.343 | NA     | NA     | 13.365 | 12.481 | NA    | NA    | NA    |



|                  |        |        |        |        |        |        |       |    |       |
|------------------|--------|--------|--------|--------|--------|--------|-------|----|-------|
| TCGA-S9-A6WG-01A | 13.974 | 13.602 | NA     | NA     | 11.859 | 10.974 | 9.332 | NA | NA    |
| TCGA-S9-A6WH-01A | 15.595 | 15.223 | NA     | NA     | 11.523 | 10.639 | NA    | NA | 10.64 |
| TCGA-S9-A6WI-01A | 14.88  | 14.508 | NA     | NA     | 13.228 | 12.344 | NA    | NA | 9.176 |
| TCGA-S9-A6WL-01A | 14.032 | 13.66  | 11.42  | 11.213 | 15.12  | 14.235 | NA    | NA | NA    |
| TCGA-S9-A6WM-01A | 15.62  | 15.248 | NA     | 10.894 | NA     | NA     | NA    | NA | NA    |
| TCGA-S9-A6WN-01A | 12.972 | 12.6   | 10.553 | 10.346 | 9.5537 | 8.6708 | NA    | NA | NA    |
| TCGA-S9-A6WO-01A | 12.923 | 12.551 | NA     | NA     | 13.75  | 12.866 | 8.563 | NA | NA    |
| TCGA-S9-A6WP-01A | 15.054 | 14.682 | NA     | NA     | 14.257 | 13.372 | NA    | NA | NA    |
| TCGA-S9-A6WQ-01A | 14.948 | 14.576 | 10.978 | 10.772 | 14.785 | 13.9   | 9.037 | NA | NA    |
| TCGA-S9-A7IQ-01A | 16.023 | 15.651 | 11.323 | 11.116 | 12.907 | 12.023 | NA    | NA | NA    |
| TCGA-S9-A7IS-01A | 16.727 | 16.355 | NA     | NA     | 12.084 | 11.2   | 9.558 | NA | NA    |
| TCGA-S9-A7IX-01A | 14.912 | 14.54  | 13.051 | 12.845 | 15.695 | 14.811 | NA    | NA | 8.585 |
| TCGA-S9-A7IY-01A | 15.414 | 15.042 | NA     | NA     | 14.399 | 13.514 | 9.65  | NA | NA    |
| TCGA-S9-A7IZ-01A | 15.572 | 15.201 | 12.712 | 12.505 | 14.034 | 13.149 | NA    | NA | NA    |
| TCGA-S9-A7J0-01A | 15.044 | 14.672 | NA     | NA     | 12.062 | 11.178 | 9.535 | NA | NA    |
| TCGA-S9-A7J1-01A | 15.786 | 15.414 | NA     | NA     | 12.267 | 11.382 | NA    | NA | NA    |
| TCGA-S9-A7J2-01A | 15.928 | 15.556 | NA     | NA     | 13.882 | 12.998 | NA    | NA | 9.677 |
| TCGA-S9-A7J3-01A | 16.089 | 15.717 | 14.061 | 13.855 | NA     | NA     | NA    | NA | NA    |
| TCGA-S9-A7QW-01A | 16.686 | 16.314 | NA     | NA     | NA     | NA     | 11.37 | NA | NA    |
| TCGA-S9-A7QX-01A | 18.498 | 18.126 | NA     | NA     | NA     | NA     | NA    | NA | NA    |
| TCGA-S9-A7QY-01A | 16.575 | 16.203 | 11.105 | 10.898 | 11.105 | 10.221 | 11.16 | NA | NA    |
| TCGA-S9-A7QZ-01A | 15.28  | 14.908 | 9.3836 | 9.1775 | 13.469 | 12.585 | 10.02 | NA | 11.08 |
| TCGA-S9-A7R1-01A | 16.059 | 15.687 | 11.692 | 11.485 | 14.013 | 13.129 | NA    | NA | NA    |
| TCGA-S9-A7R2-01A | 13.339 | 12.967 | NA     | NA     | 12.938 | 12.053 | 8.539 | NA | NA    |
| TCGA-S9-A7R3-01A | 14.816 | 14.444 | NA     | NA     | 12.68  | 11.795 | 8.739 | NA | NA    |
| TCGA-S9-A7R4-01A | 13.213 | 12.841 | 9.5147 | 9.3086 | 14.557 | 13.673 | NA    | NA | 9.63  |
| TCGA-S9-A7R7-01A | 14.87  | 14.498 | 10.351 | 12.728 | 17.183 | 16.298 | NA    | NA | 9.467 |
| TCGA-S9-A7R8-01A | 14.164 | 13.792 | NA     | NA     | 14.21  | 13.326 | NA    | NA | NA    |
| TCGA-S9-A89V-01A | 13.069 | 12.697 | 10.896 | 10.689 | 12.217 | 11.333 | 6.644 | NA | NA    |
| TCGA-S9-A89Z-01A | 14.535 | 14.163 | 9.1303 | 8.9243 | 14.636 | 13.751 | NA    | NA | NA    |
| TCGA-TM-A7C3-01A | 14.03  | 13.658 | NA     | NA     | 9.1338 | 8.2515 | 9.19  | NA | NA    |
| TCGA-TM-A7C4-01A | 14.716 | 14.344 | NA     | NA     | 13.058 | 12.174 | 10.7  | NA | 10.76 |
| TCGA-TM-A7C5-01A | 16.171 | 15.799 | NA     | NA     | 11.929 | 11.045 | 11.31 | NA | NA    |
| TCGA-TM-A7CA-01A | 14.334 | 13.962 | NA     | NA     | 12.721 | 11.837 | NA    | NA | NA    |
| TCGA-TM-A7CF-01A | 14.261 | 13.889 | 10.649 | 10.443 | 13.456 | 12.571 | NA    | NA | NA    |
| TCGA-TM-A84B-01A | 15.569 | 15.197 | NA     | NA     | NA     | NA     | NA    | NA | NA    |
| TCGA-TM-A84C-01A | 15.067 | 14.695 | NA     | 8.7915 | 11.995 | 11.111 | NA    | NA | NA    |
| TCGA-TM-A84F-01A | 15.371 | 14.999 | 9.4385 | 9.2323 | 11.437 | 10.553 | NA    | NA | NA    |
| TCGA-TM-A84G-01A | 15.132 | 14.76  | NA     | NA     | NA     | NA     | 9.186 | NA | NA    |
| TCGA-TM-A84H-01A | 14.742 | 14.37  | NA     | NA     | NA     | NA     | 10.66 | NA | 9.722 |
| TCGA-TM-A84I-01A | 14.984 | 14.612 | 9.3504 | 9.1443 | 10.349 | 9.4657 | NA    | NA | NA    |
| TCGA-TM-A84J-01A | 15.169 | 14.797 | NA     | NA     | 12.235 | 11.35  | 9.418 | NA | 9.477 |
| TCGA-TM-A84L-01A | 14.882 | 14.51  | NA     | NA     | 12.441 | 11.557 | 9.178 | NA | NA    |
| TCGA-TM-A84M-01A | 15.937 | 15.565 | NA     | NA     | 12.324 | 11.44  | 8.577 | NA | NA    |
| TCGA-TM-A84O-01A | 13.505 | 13.133 | NA     | NA     | 12.67  | 11.785 | NA    | NA | NA    |
| TCGA-TM-A84Q-01A | 17.408 | 17.036 | NA     | NA     | NA     | NA     | NA    | NA | NA    |
| TCGA-TM-A84R-01A | 14.131 | 13.759 | NA     | NA     | 13.381 | 12.496 | NA    | NA | 10.18 |
| TCGA-TM-A84S-01A | 15.542 | 15.17  | NA     | NA     | 12.081 | 11.197 | NA    | NA | NA    |
| TCGA-TM-A84T-01A | 14.065 | 13.693 | NA     | NA     | 13.172 | 12.287 | NA    | NA | NA    |
| TCGA-TQ-A7RF-01A | 14.409 | 14.037 | NA     | NA     | NA     | NA     | NA    | NA | NA    |
| TCGA-TQ-A7RG-01A | 15.678 | 15.306 | NA     | NA     | 12.191 | 11.307 | 9.664 | NA | NA    |
| TCGA-TQ-A7RH-01A | 15.409 | 15.037 | NA     | NA     | 10.647 | 9.763  | 8.706 | NA | 8.765 |
| TCGA-TQ-A7RI-01A | 15.164 | 14.792 | NA     | NA     | 11.645 | 10.761 | 9.703 | NA | NA    |

|                  |        |        |        |        |        |        |       |       |       |
|------------------|--------|--------|--------|--------|--------|--------|-------|-------|-------|
| TCGA-TQ-A7RJ-01A | 14.156 | 13.784 | 10.736 | 10.53  | 12.735 | 11.851 | NA    | NA    | NA    |
| TCGA-TQ-A7RK-01A | 14.713 | 14.341 | NA     | NA     | 13.1   | 12.216 | NA    | NA    | NA    |
| TCGA-TQ-A7RM-01A | 14.243 | 13.871 | NA     | NA     | 10.108 | 9.2244 | 10.16 | NA    | NA    |
| TCGA-TQ-A7RN-01A | 15.162 | 14.79  | NA     | NA     | NA     | NA     | 9.749 | NA    | NA    |
| TCGA-TQ-A7RO-01A | 15.806 | 15.434 | NA     | NA     | 11.439 | 10.555 | 11.5  | NA    | NA    |
| TCGA-TQ-A7RP-01A | 13.544 | 13.173 | 10.54  | 10.334 | 11.861 | 10.977 | NA    | NA    | NA    |
| TCGA-TQ-A7RQ-01A | 15.418 | 15.046 | NA     | NA     | 11.718 | 10.833 | NA    | NA    | NA    |
| TCGA-TQ-A7RR-01A | 15.095 | 14.723 | NA     | NA     | 10.529 | 9.645  | 9.586 | NA    | 9.645 |
| TCGA-TQ-A7RS-01A | 16.906 | 16.534 | NA     | NA     | 10.936 | 10.052 | 10.99 | NA    | NA    |
| TCGA-TQ-A7RV-01A | 16.833 | 16.461 | 12.697 | 12.49  | NA     | NA     | NA    | NA    | NA    |
| TCGA-TQ-A7RW-01A | 13.991 | 13.62  | NA     | NA     | 11.472 | 10.588 | NA    | NA    | 9.589 |
| TCGA-TQ-A8XE-01A | 15.724 | 15.352 | NA     | NA     | NA     | NA     | NA    | NA    | NA    |
| TCGA-VM-A8C8-01A | 13.91  | 13.538 | NA     | NA     | 12.004 | 11.12  | 9.74  | NA    | 7.804 |
| TCGA-VM-A8C9-01A | 12.406 | 12.035 | NA     | 8.5905 | 10.964 | 10.08  | 7.856 | NA    | NA    |
| TCGA-VM-A8CA-01A | 13.603 | 13.231 | 10.183 | 9.9772 | 12.352 | 11.468 | 8.244 | NA    | NA    |
| TCGA-VM-A8CB-01A | 15.094 | 14.722 | NA     | NA     | 12.674 | 11.789 | 10.73 | NA    | NA    |
| TCGA-VM-A8CD-01A | 12.514 | 12.142 | 9.902  | 9.6957 | 11.486 | 10.602 | NA    | NA    | NA    |
| TCGA-VM-A8CE-01A | 15.376 | 15.004 | 10.787 | 10.58  | 11.371 | 10.487 | 10.43 | NA    | NA    |
| TCGA-VM-A8CF-01A | 14.266 | 13.894 | NA     | NA     | 12.22  | 11.336 | 8.958 | NA    | NA    |
| TCGA-VM-A8CH-01A | 16.716 | 16.344 | NA     | NA     | NA     | NA     | 9.231 | NA    | NA    |
| TCGA-VV-A829-01A | 14.478 | 14.106 | NA     | NA     | 11.502 | 10.618 | NA    | NA    | NA    |
| TCGA-VV-A86M-01A | 14.676 | 14.304 | NA     | 10.103 | 13.893 | 13.008 | 9.367 | NA    | NA    |
| TCGA-VW-A7QS-01A | 16.631 | 16.259 | NA     | NA     | 11.869 | 10.985 | NA    | NA    | NA    |
| TCGA-VW-A8FI-01A | 14.43  | 14.058 | 8.5172 | 8.3114 | 8.5172 | 7.636  | NA    | NA    | NA    |
| TCGA-W9-A837-01A | 14.192 | 13.82  | 10.057 | 9.8503 | 10.057 | 9.1732 | NA    | NA    | NA    |
| TCGA-WH-A86K-01A | 14.301 | 13.929 | NA     | NA     | 12.689 | 11.804 | 9.872 | NA    | 8.349 |
| TCGA-WY-A858-01A | 14.117 | 13.745 | 8.7264 | 9.5185 | 13.581 | 12.697 | NA    | NA    | NA    |
| TCGA-WY-A859-01A | 15.212 | 14.84  | 10.077 | 9.8704 | 13.397 | 12.513 | NA    | NA    | NA    |
| TCGA-WY-A85A-01A | 15.49  | 15.118 | NA     | NA     | 13.499 | 12.614 | NA    | NA    | 9.295 |
| TCGA-WY-A85B-01A | 16.637 | 16.265 | NA     | 10.461 | NA     | NA     | NA    | NA    | NA    |
| TCGA-WY-A85C-01A | 15.017 | 14.645 | NA     | NA     | 11.945 | 11.061 | NA    | NA    | NA    |
| TCGA-WY-A85D-01A | 14.825 | 14.453 | NA     | NA     | 10.599 | 9.7149 | NA    | NA    | NA    |
| TCGA-WY-A85E-01A | 13.78  | 13.408 | NA     | NA     | 10.92  | 10.036 | NA    | NA    | NA    |
| TCGA-06-0675-11A | 15.599 | 15.227 | 10.777 | 11.57  | 12.776 | 11.892 | 10.83 | NA    | 11.89 |
| TCGA-06-0678-11A | 15.296 | 14.924 | NA     | NA     | 10.684 | 9.8    | 9.741 | NA    | 11.38 |
| TCGA-06-0680-11A | 15.068 | 14.696 | NA     | NA     | 11.7   | 10.816 | 11.34 | NA    | 9.817 |
| TCGA-06-0681-11A | 15.172 | 14.8   | NA     | NA     | 12.804 | 11.92  | NA    | 9.982 | 9.921 |
| TCGA-06-AABW-11A | 16.034 | 15.662 | NA     | NA     | 12.778 | 11.893 | 9.836 | NA    | NA    |
